# Supplementary material
Source: bioRxiv or medRxiv preprint supplement (http://medrxiv.stage.highwire.org/highwire/filestream/90401/field_highwire_adjunct_files/1/2020.07.21.20158808-2.pdf)
Supplement: Supplementary file [file 2020.07.21.20158808-2.pdf]

# Additional File S2 - Mode and dynamics of *vanA*-type vancomycin-resistance dissemination in Dutch hospitals

**Authors:** Sergio Arredondo-Alonso<sup>1</sup>, Janetta Top<sup>1</sup>, Jukka Corander<sup>2,3,4</sup>, Rob J L Willems<sup>1</sup>, Anita C Schürch<sup>1</sup>

<sup>1</sup>Department of Medical Microbiology, University Medical Center Utrecht, Utrecht, The Netherlands.

<sup>2</sup>Pathogen Genomics, Wellcome Trust Sanger Institute, Cambridge CB10 1SA, UK.

<sup>3</sup>Department of Biostatistics, University of Oslo, Oslo, Norway.

<sup>4</sup>Department of Mathematics and Statistics, Helsinki Institute of Information Technology (HIIT), FI-00014 University of Helsinki, Finland.

## Characterization of the genomic organization present in the plasmid types

The network approach, based on complete plasmid sequences (n =26), allowed the identification of six distinct plasmid types (A-F). Next, we explored the content of these plasmid types (A-F) with a focus on: i) replication initiator proteins (rep), ii) Tn1546 variant compared to the original sequence described by Arthur et al. (1), iii) AMR genes distinct from the *vanA* gene cluster and iv) presence of well-known *E. faecium* plasmid TA systems such as  $\omega$ - $\epsilon$ - $\zeta$  and axe-txe (2).

The plasmid type A was highly similar to large RepA plasmids with a size ranging from 141.9 kbp to 189.4 kbp (mean = 157.1 kbp, median = 141.9 kbp). A similar-sized RepA plasmid was also previously identified, using pulsed-field gel electrophoresis patterns, in pig and healthy human isolates recovered in the same time period from Denmark, Portugal, Spain, Switzerland, and the United States (3). The plasmid described in the previous study (3) carried Tn1546 variant, termed 'D' (3,4), which corresponded to deletions in *orf1* (1-120) and the SNP position G8234T. In our study, type A plasmids showed the same Tn1546 variant. However, the Tn1546 variant present in plasmid E0656\_2 carried an extra SNP position C4947T. Tn1546 is flanked by IS1216 elements upstream and downstream from the transposon (Figure S3). This RepA

megaplasmid also encodes for the *erm(B)* gene conferring resistance to erythromycin and a copper resistance operon *tcrYAZB* which has been shown to be implicated in tolerance to high levels of this heavy metal (5). This plasmid also encodes the TA system  $\omega$ - $\epsilon$ - $\zeta$  previously described in poultry isolates (6). The mobilisation of this plasmid type between distinct hosts, healthy humans and pigs, could be explained by the presence of the type IV secretion gene *traG*. This *traG* gene has been previously reported in pIP501, a conjugative broad-host-range plasmid present in nosocomial *E. faecium* and *E. faecalis* isolates (7).

Plasmid type B is a multireplicon RepA\_N & Rep\_3-like plasmid with a length ranging from 35.7 kbp to 61.1 kbp. The Tn1546 variant present in this type is characterized by the insertion of the IS1251-like element (5820) and SNPs at positions T7658C, G8234T and C9692T. Two plasmids, E7246\_6 and E8423\_3, showed the additional SNP G4351T. We also observed deletions in *orf1*, *orf2* mostly between the coordinates 1-3703 but also in the coordinates 1-3344. This Tn1546 variant was previously termed as 'C' because of the presence of the IS1251-like element (8). Also in this plasmid, Tn1546 was surrounded by two IS1216 elements (Suppl. Figure S3). Plasmid type B also contained other AMR genes including: i) *erm(B)*, erythromycin resistance, ii) *aph(3')*, aminoglycoside resistance and iii) *cfr(C)*, linezolid resistance. In addition, this plasmid contains the TA axe-txe complex first described in the *E. faecium* pRUM plasmid (9).

Plasmid type C corresponds to a multireplicon Inc18 & Rep\_trans plasmids ranging in size from 42.6 kbp to 49.9 kbp (mean = 45.1 kbp, median = 42.7 kbp). The Tn1546 variant observed in this plasmid contained two IS1216 elements inserted in positions 3932 and 8646, respectively. In addition, we observed deletions in *orf1*, *orf2* (1-3677) and in the intergenic region 8649-8828 or 8649-8926. As previously described, the specific coordinates of the deletions could differ between the isolates while the rest of SNP coordinates or IS-elements were identical. In this plasmid type, we also observed the presence of other AMR genes including *ant(6)-Ia* and *erm(B)* conferring resistance to aminoglycoside and erythromycin, respectively.

Plasmid type D is an Inc18 plasmids with a size ranging from 41.1 kbp to 47.9 kbp (mean = 44.5 kbp, median = 44.5 kbp). The Tn1546 variant present in this plasmid type contains an insertion of ISEf1 (9051) and the SNP G7747T. However, the coordinates of deletions present in Tn1546 were different between the isolates bearing the plasmid type D. The Tn1546 variant present in the plasmid E6055\_4 showed a deletion in *vanZ* (10489-10851), the transposon variant in the plasmid E8040\_4 presented deletions in *vanS* (5895-5932) and the intergenic region (10705-10851). In the plasmid type D, the Tn1546 variant showed the presence of an IS1216

element downstream the *vanZ* gene (Suppl. Figure S3). The plasmid type D also encoded the *erm(B)* gene conferring resistance to erythromycin.

The plasmid type E is a multireplicon Inc18 & Rep3 plasmid with a size ranging from 45 kbp to 46 kbp (mean = 45.8 kbp, median = 45.8 kbp). We observed the original Tn1546 variant, also termed as 'A', with no deletions, IS elements or point mutations present in comparison to the sequence described by Arthur et al. (1). This plasmid has been previously described as pVEF4 and characterized in poultry isolates from Norway and Denmark (10). Plasmid type E reported here, contained functional and truncated *str* genes conferring resistance to streptomycin. We uniquely observed two components,  $\omega$  -  $\epsilon$  , of the TA system previously described in *E. faecium* plasmid sequences derived from poultry isolates (6).

Lastly, the plasmid type F is a multireplicon Inc18 & Rep3-like, with an additional Rep2-like element in some isolates. The size of the plasmids ranged from 38.6 kbp to 63.68 kbp (mean = 48.2 kbp, median = 48.2 kbp). This plasmid contained a Tn1546 variant carrying IS1216 insertions at positions 5768 and 8839 with a deletion in *orf1* (1-2548). The IS1216 insertion in the position 8839 has been previously reported (11). Notably, in the plasmid type F, the Tn1546 element was split into blocks which were surrounded by IS1216 elements (Suppl. Figure S3). The *vanR* and *vanS* genes were separated (> 10 kbp) from the rest of the *vanA* gene cluster (Suppl. Figure S3). In some plasmids E6020\_3, E6988\_5, E7025\_5 and E7067\_5, we observed other AMR genes including *erm(B)*, *aph(3')-III*, *ant(6)-Ia* and *lnu(B)* linked to the co-integration of a Rep2-like plasmid. In all the plasmids from this type, we observed the presence of the TA system  $\omega$  -  $\epsilon$  -  $\zeta$  .

## Characterization of the predicted plasmid bins

To elucidate gene content and synteny of these plasmid bins, we integrated the six plasmid types (A-F) derived from complete plasmid sequences (Table 1, Figure 2) with the plasmid bins predicted by gplas. We calculated Mash distances ( $k = 21$ ,  $s = 1,000$ ) between the complete *vanA* plasmid sequences ( $n = 26$ ) and the predicted *vanA* plasmid bins ( $n = 282$ ). The presence of edges connecting complete plasmids and predicted *vanA* plasmid bins revealed that the predictions had a similar k-mer content and thus further validated the predicted *vanA* plasmid bins. Furthermore, this approach also allowed to elucidate the content and structure of the plasmids present in the predicted network. Due to the fragmented nature of the predicted plasmid bins, the Tn1546 characterisation was performed considering uniquely SNP and deletions respect to the original transposon sequence described by Arthur et al (1).

We focused on the presence of eight distinct group of bins which corresponded to subgraphs highly interconnected in the network with more than 10 nodes (Figure 6, Table 2).

Plasmid bins in the group 7 co-clustered in the network together with plasmids type A (n = 12) (Figure 6). Isolates carrying this plasmid type belonged to three distinct SCs : SC29, SC30, and SC32 (Table 2). All isolates were recovered from a single Dutch province (North Holland) spanning three years (2012 to 2015). The *Tn1546* characterisation revealed that all plasmids (predicted and completed) shared a SNP position and deletion of *orf1* (1-119).

Plasmid bins in the group 4 co-clustered with plasmid type B (n = 62) (Figure S5). Isolates carrying this plasmid type belonged to three different SCs (10,17,18) and were isolated from different Dutch cities (Amsterdam, Lelystad, Zwolle, Utrecht, Nieuwegein and Rotterdam) in 2012. Most of the predicted plasmids (n = 45, 72.6%) exhibited the SNP positions T7658C and G8234T and six isolates (9.7%) had the additional SNP position C9692T. These SNP positions coincide with the *Tn1546* variant previously reported for plasmid type B. In addition, deletions in *orf1* and *orf2*, with coordinates 1-3343, were identified in 88.2% of the cases.

Plasmid bins in the group 3 co-clustered with plasmid type C (n = 76) (Fig. S5). Isolates carrying this plasmid type belonged mostly to four distinct SCs: 13,12,1,10 (Table 2) which suggested horizontal transmission of the plasmid type C between non-clonal isolates. Furthermore, the predicted plasmids were widely observed in the Netherlands during the entire collection period (2012-2015). *Tn1546* characterisation identified deletions in the *orf1*, *orf2* region (1-3417 in 53.1% and 1-3676 in 32.8% cases) and in the intergenic region (8650-8827). We observed an independent plasmid bin group 2 mainly formed by isolates belonging to SC13 (Table 2) but geographical widespread in the Netherlands between 2012 and 2015. Detailed analysis of the predicted plasmid types of isolates E7313, E8014, E8414, with associated complete plasmid sequences, revealed that these plasmids were linked to both plasmid bin groups 2 and 3, while their complete plasmid sequences belonged to a single plasmid type C. Furthermore, both predicted *vanA* plasmid bins (2, 3) shared the same *Tn1546* variants. These observations suggested that the predicted plasmid bins groups 2 and 3 should be merged and named type-C.

Plasmid bins belonging to the group 6 co-clustered with plasmid type D (Figure 6). Isolates carrying this plasmid type mainly belonged to isolates with SC20, SC18, SC1, and SC22. They were located widespread around the Netherlands, and retrieved between 2012-2015. The most

predominant Tn1546 variant present in this plasmid type (82.4% cases) contained the G7747T SNP and deletions in the intergenic regions 5896-5931 and 10706-10851.

Predicted group (plasmid bins) 1 represented a novel plasmid type, termed G, as it was not linked to one of the six plasmid-types (A-F). Isolates carrying this novel plasmid type G (n = 11) belonged to SC10 (Table 2). The majority of the isolates were from Utrecht and isolated in April-May 2012 (n = 9). However, we also found two isolates from May 2013 (E7837) and March 2014 (E8046) which were present in nearby Dutch cities (Ede and Amersfoort). All isolates (n = 11, 100%) shared the same Tn1546 variant with the SNPs T7658C and G8234T.

The predicted group 8 formed a novel plasmid type, termed I. All isolates (n = 10) carrying this *vanA* plasmid type belonged to SC18 and were isolated in Venlo (Limburg province) during September-October 2014. Tn1546 identified in this plasmid was identical to the original transposon described by Arthur et al. (1).

Plasmid types E, F, identified in the fully assembled strains, did not have connections to the predicted plasmid bins in the network (Figure 5). This suggested that these plasmid types were not present in the Dutch collection.

## Supplementary References

1. Arthur M, Molinas C, Depardieu F. Characterization of Tn1546, a Tn3-related transposon conferring glycopeptide resistance by synthesis of depsipeptide peptidoglycan precursors in *Enterococcus faecium* BM4147 Journal of Bacteriology. 1993;175(1):117–27.
2. Fernández-García L, Blasco L, Lopez M, Bou G, García-Contreras R, Wood T, et al. Toxin-Antitoxin Systems in Clinical Pathogens. Toxins. 2016 Jul 20;8(7). Available from: <http://dx.doi.org/10.3390/toxins8070227>
3. Freitas AR, Coque TM, Novais C, Hammerum AM, Lester CH, Zervos MJ, et al. Human and swine hosts share vancomycin-resistant *Enterococcus faecium* CC17 and CC5 and *Enterococcus faecalis* CC2 clonal clusters harboring Tn1546 on indistinguishable plasmids. J Clin Microbiol. 2011 Mar;49(3):925–31.
4. Jensen LB, Poulsen RL, Westh H, Hammerum AM. Vancomycin-Resistant *Enterococcus faecium* Strains with Highly Similar Pulsed-Field Gel Electrophoresis Patterns Containing Similar Tn1546-Like Elements Isolated from a Hospitalized Patient and Pigs in Denmark. Vol. 43, Antimicrobial Agents and Chemotherapy. 1999. p. 724–5. Available from: <http://dx.doi.org/10.1128/aac.43.3.724>

5. Arredondo-Alonso S, Top J, McNally A, Puranen S, Pesonen M, Pensar J, et al. Plasmids Shaped the Recent Emergence of the Major Nosocomial Pathogen *Enterococcus faecium*. MBio. 2020 Feb 11;11(1). Available from: <http://dx.doi.org/10.1128/mBio.03284-19>
6. Sletvold H, Johnsen PJ, Hamre I, Simonsen GS, Sundsfjord A, Nielsen KM. Complete sequence of *Enterococcus faecium* pVEF3 and the detection of an omega-epsilon-zeta toxin-antitoxin module and an ABC transporter. Plasmid. 2008 Jul;60(1):75–85.
7. Arends K, Celik E-K, Probst I, Goessweiner-Mohr N, Fercher C, Grumet L, et al. TraG encoded by the pIP501 type IV secretion system is a two-domain peptidoglycan-degrading enzyme essential for conjugative transfer. J Bacteriol. 2013 Oct;195(19):4436–44.
8. Wardal E, Kuch A, Gawryszewska I, Żabicka D, Hryniewicz W, Sadowy E. Diversity of plasmids and Tn1546-type transposons among *VanA* *Enterococcus faecium* in Poland. Eur J Clin Microbiol Infect Dis. 2017 Feb;36(2):313–28.
9. Grady R, Hayes F. Axe-Txe, a broad-spectrum proteic toxin-antitoxin system specified by a multidrug-resistant, clinical isolate of *Enterococcus faecium*. Mol Microbiol. 2003 Mar;47(5):1419–32.
10. Leinweber H, Alotaibi SMI, Overballe-Petersen S, Hansen F, Hasman H, Bortolaia V, et al. Vancomycin resistance in *Enterococcus faecium* isolated from Danish chicken meat is located on a pVEF4-like plasmid persisting in poultry for 18 years. Int J Antimicrob Agents. 2018 Aug;52(2):283–6.
11. Novais C, Freitas AR, Sousa JC, Baquero F, Coque TM, Peixe LV. Diversity of Tn1546 and its role in the dissemination of vancomycin-resistant enterococci in Portugal. Antimicrob Agents Chemother. 2008 Mar;52(3):1001–8.
